# Supplementary material for: Buccal swab as a reliable predictor for X inactivation ratio in inaccessible tissues
Source: PubMed Central journal article supplement — J Med Genet. 2015 Jul 28;52(11):784–90. doi: 10.1136/jmedgenet-2015-103194 (PMC4680131; doi:10.1136/jmedgenet-2015-103194), 2015-07-28
Supplement: jmedgenet-2015-103194-s1.pdf [file jmedgenet-2015-103194-s1.pdf]

## Supplementary Figures:

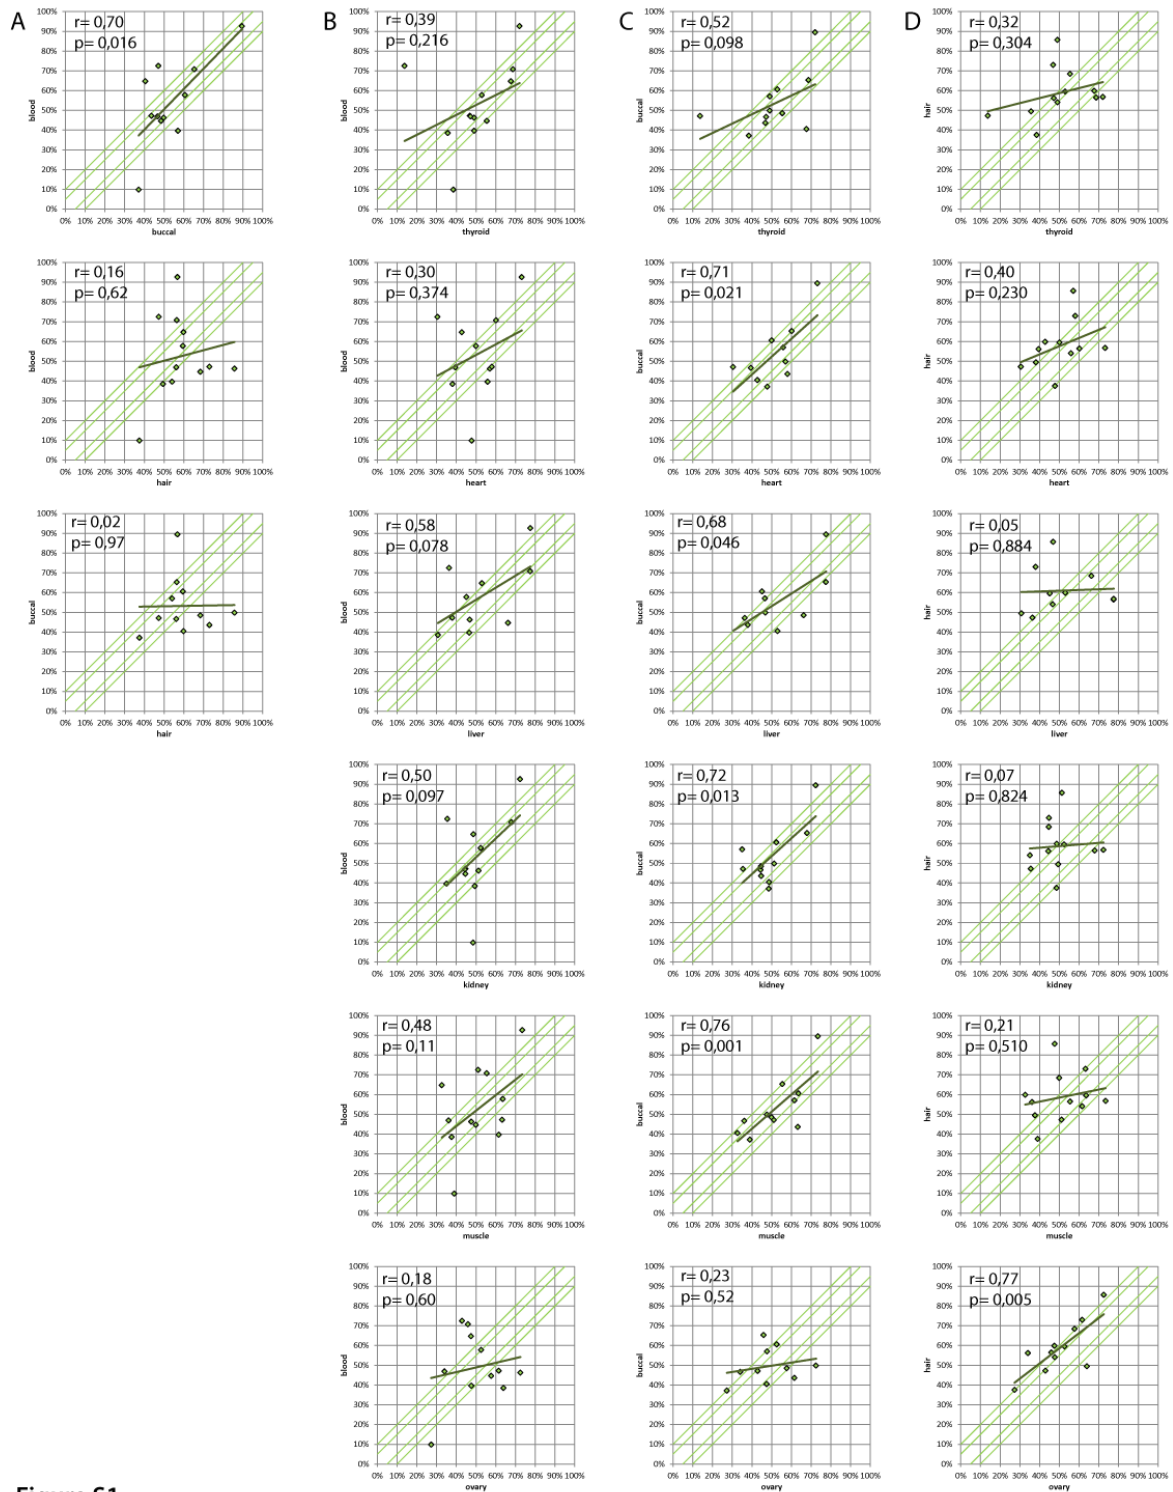

**Figure S1**

Correlation between easily accessible tissues and inaccessible tissues

A. Plot showing the correlation between three easily accessible tissues: blood, buccal epithelium and ovary. The dark green line represents the correlation coefficient. The lighter green lines indicate the area where the maximum difference between two tissues is 10% (inner green lines) or 20% (outer green lines).

B. Plot of the correlation between blood and inaccessible tissues.

C. Plot of the correlation between buccal and inaccessible tissues.

D. Plot of the correlation between hair and inaccessible tissues.

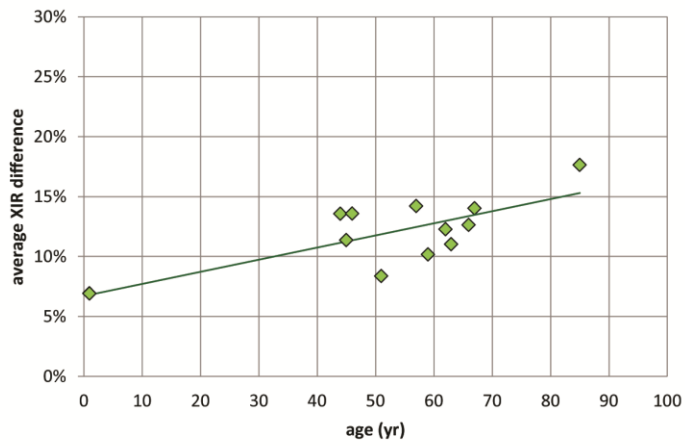

**Figure S2. Variation between tissues increases with age.**

Each data point represents the average XIR difference for a single individual. The average XIR difference was calculated from the XIR differences for all tissue combinations within an individual. Green line represents the correlation coefficient.
